# Supplementary material for: Sex, rurality and socioeconomical status in Spanish centennial population (2017)
Source: publisher site journal article supplement (doi:10.18632/aging.203563), 2021-09-26
Supplement: Supplementary file [file aging-v13i18-203563-supplementary-material-SD1.pdf]

## SUPPLEMENTARY TABLES

**Supplementary Table 1. Total population by sex in 2017.**

| Autonomous community | % Women | % Men | Autonomous community | % Women | % Men |
|----------------------|---------|-------|----------------------|---------|-------|
| ESPAÑA               | 50,97   | 49,03 | COMUNIDAD VALENCIANA | 50,70   | 49,30 |
| ANDALUCÍA            | 50,67   | 49,33 | EXTREMADURA          | 50,45   | 49,55 |
| ARAGÓN               | 50,65   | 49,35 | GALICIA              | 51,84   | 48,16 |
| ASTURIAS             | 52,28   | 47,72 | LA RIOJA             | 50,69   | 49,31 |
| BALEARES             | 50,28   | 49,72 | MADRID               | 52,12   | 47,88 |
| CANARIAS             | 50,42   | 49,58 | MURCIA               | 49,93   | 50,07 |
| CANTABRIA            | 51,44   | 48,56 | NAVARRA              | 50,46   | 49,54 |
| CASTILLA LA MANCHA   | 49,95   | 50,05 | PAÍS VASCO           | 51,38   | 48,62 |
| CASTILLA Y LEÓN      | 50,73   | 49,27 | CEUTA                | 49,35   | 50,65 |
| CATALUÑA             | 50,90   | 49,10 | MELILLA              | 49,34   | 50,66 |

Percentage of the total Spanish population by sex and by Autonomous Communities obtained from the INE.

**Supplementary Table 2. Total centennial population by sex in 2017.**

| Autonomous community | % Women | % Men | Autonomous community | % Women | % Men |
|----------------------|---------|-------|----------------------|---------|-------|
| ESPAÑA               | 76,73   | 23,27 | COMUNIDAD VALENCIANA | 75,74   | 24,26 |
| ANDALUCÍA            | 74,94   | 25,06 | EXTREMADURA          | 74,02   | 25,98 |
| ARAGÓN               | 77,34   | 22,66 | GALICIA              | 75,72   | 24,28 |
| ASTURIAS             | 78,31   | 21,69 | LA RIOJA             | 76,17   | 23,83 |
| BALEARES             | 76,99   | 23,01 | MADRID               | 79,33   | 20,67 |
| CANARIAS             | 72,26   | 27,74 | MURCIA               | 72,91   | 27,09 |
| CANTABRIA            | 80,07   | 19,93 | NAVARRA              | 77,46   | 22,54 |
| CASTILLA LA MANCHA   | 73,11   | 26,89 | PAÍS VASCO           | 81,32   | 18,68 |
| CASTILLA Y LEÓN      | 75,31   | 24,69 | CEUTA                | 71,01   | 28,99 |
| CATALUÑA             | 78,11   | 21,89 | MELILLA              | 76,47   | 23,53 |

Percentage of the total Spanish centennial population by sex and by Autonomous Communities obtained from the INE.

**Supplementary Table 3. Total centennial population by sex in 2017.**

| Province               | % Women | % Men | Province   | % Women | % Men |
|------------------------|---------|-------|------------|---------|-------|
| ESPAÑA                 | 76,73   | 23,27 | SEGOVIA    | 76,95   | 23,05 |
| ALMERIA                | 70,62   | 29,38 | SORIA      | 74,48   | 25,52 |
| CÁDIZ                  | 76,78   | 23,22 | VALLADOLID | 77,98   | 22,02 |
| CÓRDOBA                | 75,35   | 24,65 | ZAMORA     | 69,71   | 30,29 |
| GRANADA                | 74,38   | 25,62 | BARCELONA  | 79,19   | 20,81 |
| HUELVA                 | 76,77   | 23,23 | GIRONA     | 76,17   | 23,83 |
| JAÉN                   | 73,16   | 26,84 | LLEIDA     | 74,86   | 25,14 |
| MÁLAGA                 | 72,39   | 27,61 | TARRAGONA  | 74,49   | 25,51 |
| SEVILLA                | 77,9    | 22,1  | ALICANTE   | 75,06   | 24,94 |
| HUESCA                 | 73,37   | 26,63 | CASTELLÓN  | 74,92   | 25,08 |
| TERUEL                 | 73,64   | 26,36 | VALENCIA   | 76,4    | 23,6  |
| ZARAGOZA               | 79,35   | 20,65 | BADAJOS    | 76,75   | 23,25 |
| ASTURIAS               | 78,31   | 21,69 | CÁCERES    | 71,29   | 28,71 |
| BALEARES               | 76,99   | 23,01 | A CORUÑA   | 76,91   | 23,09 |
| LAS PALMAS             | 73,01   | 26,99 | LUGO       | 72,25   | 27,75 |
| SANTA CRUZ DE TENERIFE | 71,65   | 28,35 | OURENSE    | 75,23   | 24,77 |
| CANTABRIA              | 80,07   | 19,93 | PONTEVEDRA | 76,68   | 23,32 |
| ALBACETE               | 71,36   | 28,64 | LA RIOJA   | 76,17   | 23,83 |
| CIUDAD REAL            | 75,41   | 24,59 | MADRID     | 79,33   | 20,67 |
| CUENCA                 | 72,13   | 27,87 | MURCIA     | 72,91   | 27,09 |
| GUADALAJARA            | 72,86   | 27,14 | NAVARRA    | 77,46   | 22,54 |
| TOLEDO                 | 72,9    | 27,1  | ÁLAVA      | 80,39   | 19,61 |
| ÁVILA                  | 75,61   | 24,39 | GIPUZCOA   | 81,88   | 18,12 |
| BURGOS                 | 77,21   | 22,79 | VIZCAYA    | 81,21   | 18,79 |
| LEÓN                   | 73,95   | 26,05 | CEUTA      | 71,01   | 28,99 |
| PALENCIA               | 79,14   | 20,86 | MELILLA    | 76,47   | 23,53 |
| SALAMANCA              | 74,11   | 25,89 |            |         |       |

Percentage of the total Spanish centennial population by sex and by provinces obtained from the INE.

**Supplementary Table 4. Total population by rurality in 2017.**

| Autonomous community | % Non-rural inhabitants | % Rural inhabitants | Autonomous community | % Non-rural inhabitants | % Rural inhabitants |
|----------------------|-------------------------|---------------------|----------------------|-------------------------|---------------------|
| ESPAÑA               | 94,14                   | 5,86                | CATALUÑA             | 95,46                   | 4,54                |
| ANDALUCÍA            | 96,73                   | 3,27                | COMUNIDAD VALENCIANA | 95,86                   | 4,14                |
| ARAGÓN               | 83,93                   | 16,07               | EXTREMADURA          | 79,59                   | 20,41               |
| ASTURIAS             | 96,28                   | 3,72                | GALICIA              | 94,71                   | 5,29                |
| BALEARES             | 98,64                   | 1,36                | LA RIOJA             | 88,00                   | 12,00               |
| CANARIAS             | 99,19                   | 0,81                | MADRID               | 99,17                   | 0,83                |
| CANTABRIA            | 91,55                   | 8,45                | MURCIA               | 99,66                   | 0,34                |
| CASTILLA LA MANCHA   | 85,10                   | 14,90               | NAVARRA              | 86,75                   | 13,25               |
| CASTILLA Y LEÓN      | 74,46                   | 25,54               | PAÍS VASCO           | 95,07                   | 4,93                |

Percentage of the total Spanish population based on rural and non-rural areas and by Autonomous Communities obtained from the INE.

**Supplementary Table 5. Total centennial population by rurality in 2017.**

| <b>Autonomous community</b> | <b>% Non-rural inhabitants &gt;95</b> | <b>% Rural inhabitants &gt;95</b> | <b>Autonomous community</b> | <b>% Non-rural inhabitants &gt;95</b> | <b>% Rural inhabitants &gt;95</b> |
|-----------------------------|---------------------------------------|-----------------------------------|-----------------------------|---------------------------------------|-----------------------------------|
| <b>ESPAÑA</b>               | 87,40                                 | 12,60                             | <b>CATALUÑA</b>             | 93,41                                 | 6,59                              |
| <b>ANDALUCÍA</b>            | 94,23                                 | 5,77                              | <b>COMUNIDAD VALENCIANA</b> | 92,92                                 | 7,08                              |
| <b>ARAGÓN</b>               | 72,08                                 | 27,92                             | <b>EXTREMADURA</b>          | 64,78                                 | 35,22                             |
| <b>ASTURIAS</b>             | 93,89                                 | 6,11                              | <b>GALICIA</b>              | 87,39                                 | 12,61                             |
| <b>BALEARES</b>             | 98,11                                 | 1,89                              | <b>LA RIOJA</b>             | 82,28                                 | 17,72                             |
| <b>CANARIAS</b>             | 96,87                                 | 3,13                              | <b>MADRID</b>               | 98,68                                 | 1,32                              |
| <b>CANTABRIA</b>            | 87,21                                 | 12,79                             | <b>MURCIA</b>               | 99,50                                 | 0,50                              |
| <b>CASTILLA LA MANCHA</b>   | 70,25                                 | 29,75                             | <b>NAVARRA</b>              | 80,93                                 | 19,07                             |
| <b>CASTILLA Y LEÓN</b>      | 58,30                                 | 41,70                             | <b>PAÍS VASCO</b>           | 94,84                                 | 5,16                              |

Percentage of the total Spanish centennial population according to rural and non-rural areas and Autonomous Communities obtained from the INE.

**Supplementary Table 6. Total population by rurality in 2017.**

| Province               | % Non-rural inhabitants | % Rural inhabitants | Province   | % Non-rural inhabitants | % Rural inhabitants |
|------------------------|-------------------------|---------------------|------------|-------------------------|---------------------|
| ESPAÑA                 | 94,14                   | 5,86                | SALAMANCA  | 71,04                   | 28,96               |
| ALMERIA                | 94,70                   | 5,30                | SEGOVIA    | 64,04                   | 35,96               |
| CÁDIZ                  | 99,48                   | 0,52                | SORIA      | 71,62                   | 28,38               |
| CÓRDOBA                | 97,01                   | 2,99                | VALLADOLID | 88,71                   | 11,29               |
| GRANADA                | 91,00                   | 9,00                | ZAMORA     | 52,17                   | 47,83               |
| HUELVA                 | 95,18                   | 4,82                | BARCELONA  | 98,71                   | 1,29                |
| JAÉN                   | 93,09                   | 6,91                | GIRONA     | 87,39                   | 12,61               |
| MÁLAGA                 | 97,64                   | 2,36                | LLEIDA     | 76,49                   | 23,51               |
| SEVILLA                | 99,17                   | 0,83                | TARRAGONA  | 90,60                   | 9,40                |
| HUESCA                 | 68,52                   | 31,48               | ALICANTE   | 97,57                   | 2,43                |
| TERUEL                 | 59,81                   | 40,19               | CASTELLÓN  | 90,52                   | 9,48                |
| ZARAGOZA               | 90,91                   | 9,09                | VALENCIA   | 95,84                   | 4,16                |
| ASTURIAS               | 96,28                   | 3,72                | BADAJOS    | 86,46                   | 13,54               |
| BALEARES               | 98,64                   | 1,36                | CÁCERES    | 67,91                   | 32,09               |
| LAS PALMAS             | 99,66                   | 0,34                | A CORUÑA   | 98,04                   | 1,96                |
| SANTA CRUZ DE TENERIFE | 98,67                   | 1,33                | LUGO       | 89,53                   | 10,47               |
| CANTABRIA              | 91,55                   | 8,45                | OURENSE    | 73,98                   | 26,02               |
| ALBACETE               | 87,67                   | 12,33               | PONTEVEDRA | 99,43                   | 0,57                |
| CIUDAD REAL            | 89,86                   | 10,14               | LA RIOJA   | 88,00                   | 12,00               |
| CUENCA                 | 63,32                   | 36,68               | MADRID     | 99,17                   | 0,83                |
| GUADALAJARA            | 82,40                   | 17,60               | MURCIA     | 99,66                   | 0,34                |
| TOLEDO                 | 87,46                   | 12,54               | NAVARRA    | 86,75                   | 13,25               |
| ÁVILA                  | 64,78                   | 35,22               | ÁLAVA      | 90,40                   | 9,60                |
| BURGOS                 | 75,75                   | 24,25               | GIPUZCOA   | 96,00                   | 4,00                |
| LEÓN                   | 76,27                   | 23,73               | VIZCAYA    | 95,82                   | 4,18                |
| PALENCIA               | 73,12                   | 26,88               |            |                         |                     |

Percentage of the total Spanish population based on rural and non-rural areas and by provinces obtained from the INE.

**Supplementary Table 7. Total centennial population by rurality in 2017.**

| Province               | % Non-rural inhabitants >95 | % Rural inhabitants >95 | Province   | % Non-rural inhabitants >95 | % Rural inhabitants >95 |
|------------------------|-----------------------------|-------------------------|------------|-----------------------------|-------------------------|
| ESPAÑA                 | 87,40                       | 12,60                   | SALAMANCA  | 57,18                       | 42,82                   |
| ALMERIA                | 87,15                       | 12,85                   | SEGOVIA    | 48,86                       | 51,14                   |
| CÁDIZ                  | 99,17                       | 0,83                    | SORIA      | 57,84                       | 42,16                   |
| CÓRDOBA                | 94,78                       | 5,22                    | VALLADOLID | 77,28                       | 22,72                   |
| GRANADA                | 88,57                       | 11,43                   | ZAMORA     | 31,21                       | 68,79                   |
| HUELVA                 | 84,34                       | 15,66                   | BARCELONA  | 98,32                       | 1,68                    |
| JAÉN                   | 89,37                       | 10,63                   | GIRONA     | 84,74                       | 15,26                   |
| MÁLAGA                 | 97,36                       | 2,64                    | LLEIDA     | 66,89                       | 33,11                   |
| SEVILLA                | 98,61                       | 1,39                    | TARRAGONA  | 84,85                       | 15,15                   |
| HUESCA                 | 56,52                       | 43,48                   | ALICANTE   | 96,40                       | 3,60                    |
| TERUEL                 | 44,11                       | 55,89                   | CASTELLÓN  | 79,75                       | 20,25                   |
| ZARAGOZA               | 82,71                       | 17,29                   | VALENCIA   | 94,08                       | 5,92                    |
| ASTURIAS               | 93,89                       | 6,11                    | BADAJOS    | 77,68                       | 22,32                   |
| BALEARES               | 98,11                       | 1,89                    | CÁCERES    | 51,89                       | 48,11                   |
| LAS PALMAS             | 98,68                       | 1,32                    | A CORUÑA   | 96,56                       | 3,44                    |
| SANTA CRUZ DE TENERIFE | 95,38                       | 4,62                    | LUGO       | 82,85                       | 17,15                   |
| CANTABRIA              | 87,21                       | 12,79                   | OURENSE    | 56,63                       | 43,37                   |
| ALBACETE               | 78,16                       | 21,84                   | PONTEVEDRA | 97,91                       | 2,09                    |
| CIUDAD REAL            | 83,15                       | 16,85                   | LA RIOJA   | 82,28                       | 17,72                   |
| CUENCA                 | 46,94                       | 53,06                   | MADRID     | 98,68                       | 1,32                    |
| GUADALAJARA            | 55,88                       | 44,12                   | MURCIA     | 99,50                       | 0,50                    |
| TOLEDO                 | 73,20                       | 26,80                   | NAVARRA    | 80,93                       | 19,07                   |
| ÁVILA                  | 43,90                       | 56,10                   | ÁLAVA      | 86,84                       | 13,16                   |
| BURGOS                 | 64,68                       | 35,32                   | GIPUZCOA   | 97,37                       | 2,63                    |
| LEÓN                   | 62,22                       | 37,78                   | VIZCAYA    | 95,39                       | 4,61                    |
| PALENCIA               | 55,86                       | 44,14                   |            |                             |                         |

Percentage of the total Spanish centennial population according to rural and non-rural areas and provinces obtained from the INE.
